# Supplementary material
Source: PubMed Central journal article supplement (PMC7261787)
Supplement: supp_RA120.013444_159474_2_supp_513440_q8y9gv.pdf [file supp_RA120.013444_159474_2_supp_513440_q8y9gv.pdf]

**$\alpha$ 2, 3-linkage of sialic acid to a GPI-anchor and an unpredicted GPI attachment site in human prion protein**

Atsushi Kobayashi, Tetsuya Hirata, Takashi Nishikaze, Akinori Ninomiya, Yuta Maki,

Yoko Takada, Tetsuyuki Kitamoto, and Taroh Kinoshita

Table S1

Table S2

Table S3

Table S4

Table S5

Figure S1

Figure S2

Table S1. Identified peptides of human PrP<sup>C</sup> from KI mouse brains after C18 column.

| Fragment                                                               | Obsd. m/z | Calcd. m/z | Charge | Score | <i>P</i> |
|------------------------------------------------------------------------|-----------|------------|--------|-------|----------|
| <u>Q</u> HTVTTT <u>T</u> K + Gln->pyro-Glu (N-term Q)                  | 500.2590  | 998.5033   | 2      | 62    | 4.7e-006 |
| QHTVTTT <u>T</u> K                                                     | 508.7723  | 1015.5298  | 2      | 62    | 6.2e-006 |
| ESQAY <u>Y</u> QR                                                      | 522.7407  | 1043.4672  | 2      | 60    | 4.1e-006 |
| Y <u>P</u> GQGS <u>P</u> GGNR                                          | 545.2571  | 1088.4999  | 2      | 55    | 1.8e-005 |
| GEN <u>F</u> TETD <u>V</u> K                                           | 570.2645  | 1138.5142  | 2      | 60    | 4.5e-006 |
| R <u>P</u> K <u>P</u> GGWNTGGSR                                        | 457.2410  | 1368.7011  | 3      | 48    | 0.00011  |
| VVEQ <u>M</u> CITQYER                                                  | 778.3681  | 1554.7170  | 2      | 28    | 0.011    |
| VVEQ <u>M</u> CITQYER + Oxidation (M)                                  | 786.3632  | 1570.7120  | 2      | 70    | 5.5e-007 |
| GEN <u>F</u> TETD <u>V</u> K <u>M</u> MER + 2 Oxidation (M)            | 573.5829  | 1717.7287  | 3      | 21    | 0.022    |
| <u>H</u> MAGAAAAGAVVGG <u>L</u> GGY <u>M</u> LG <u>S</u> AMSRPIHFGSDYE | 768.9607  | 3839.7818  | 5      | 38    | 0.00046  |
| DR + 3 Oxidation (M)                                                   |           |            |        |       |          |

Table S2. Identified peptides of human PrP<sup>C</sup> from KI mouse brains after HILIC column.

| Fragment                                     | Obsd. m/z | Calcd. m/z | Charge | Score | <i>P</i> |
|----------------------------------------------|-----------|------------|--------|-------|----------|
| <u>Q</u> HTVTTTTK + Gln->pyro-Glu (N-term Q) | 500.2587  | 998.5033   | 2      | 57    | 1.5e-005 |
| QHTVTTTTK                                    | 508.7716  | 1015.5298  | 2      | 27    | 0.024    |
| ESQAYYQR                                     | 522.7411  | 1043.4672  | 2      | 60    | 4.3e-006 |
| YPGQGSPGGNR                                  | 545.2562  | 1088.4999  | 2      | 50    | 4.3e-005 |
| GENFTETDVK                                   | 570.2640  | 1138.5142  | 2      | 54    | 1.6e-005 |
| VVEQMCITQYER                                 | 778.3660  | 1554.7170  | 2      | 70    | 6.6e-007 |
| VVEQMCITQYER + Oxidation (M)                 | 786.3628  | 1570.7120  | 2      | 79    | 6.5e-008 |
| YPNQVYYRPMDEYSNQNNFVHDCVNITIK                | 906.1686  | 3620.6453  | 4      | 19    | 0.028    |

Table S3. LC-ESI-MS/MS analysis of GPI-anchor in human PrP<sup>C</sup> from KI mouse brains.

| Fragment                                      | Calcd. m/z          | Charge         | Calcd. m/z | Peak intensity                   |                     | % Total |
|-----------------------------------------------|---------------------|----------------|------------|----------------------------------|---------------------|---------|
|                                               |                     |                |            | 2 <sup>+</sup> or 3 <sup>+</sup> | Total               |         |
| G-GPI core                                    | 1211.3 <sup>+</sup> | 2 <sup>+</sup> | 606.2      | ND*                              | 0                   | 0       |
|                                               |                     | 3 <sup>+</sup> | 404.4      | ND                               |                     |         |
| G-GPI core + 4th Man                          | 1373.4 <sup>+</sup> | 2 <sup>+</sup> | 687.2      | ND                               | 0                   | 0       |
|                                               |                     | 3 <sup>+</sup> | 458.5      | ND                               |                     |         |
| G-GPI core + GalNAc                           | 1414.4 <sup>+</sup> | 2 <sup>+</sup> | 707.7      | ND                               | 0                   | 0       |
|                                               |                     | 3 <sup>+</sup> | 472.1      | ND                               |                     |         |
| G-GPI core + GalNAc + 4th Man                 | 1576.4 <sup>+</sup> | 2 <sup>+</sup> | 788.7      | 2.54 E <sup>3</sup>              | 2.54 E <sup>3</sup> | 34.5    |
| G-GPI core + GalNAc + Gal                     |                     | 3 <sup>+</sup> | 526.1      | ND                               |                     |         |
| G-GPI core + GalNAc + Gal + 4th Man           | 1738.5 <sup>+</sup> | 2 <sup>+</sup> | 869.8      | 2.78 E <sup>3</sup>              | 2.78 E <sup>3</sup> | 37.7    |
|                                               |                     | 3 <sup>+</sup> | 580.2      | ND                               |                     |         |
| G-GPI core + GalNAc + Gal + Neu5Ac            | 1867.5 <sup>+</sup> | 2 <sup>+</sup> | 934.3      | 1.24 E <sup>3</sup>              | 1.28 E <sup>3</sup> | 17.4    |
|                                               |                     | 3 <sup>+</sup> | 623.2      | 4.42 E <sup>1</sup>              |                     |         |
| G-GPI core + GalNAc + Gal + Neu5Ac + 4th Man  | 2029.6 <sup>+</sup> | 2 <sup>+</sup> | 1015.3     | 5.87 E <sup>2</sup>              | 7.63 E <sup>2</sup> | 10.4    |
|                                               |                     | 3 <sup>+</sup> | 677.2      | 1.76 E <sup>2</sup>              |                     |         |
| GS-GPI core                                   | 1298.3 <sup>+</sup> | 2 <sup>+</sup> | 649.7      | ND                               | 0                   | 0       |
|                                               |                     | 3 <sup>+</sup> | 433.4      | ND                               |                     |         |
| GS-GPI core + 4th Man                         | 1460.4 <sup>+</sup> | 2 <sup>+</sup> | 730.7      | ND                               | 0                   | 0       |
|                                               |                     | 3 <sup>+</sup> | 487.5      | ND                               |                     |         |
| GS-GPI core + GalNAc                          | 1501.4 <sup>+</sup> | 2 <sup>+</sup> | 751.2      | ND                               | 0                   | 0       |
|                                               |                     | 3 <sup>+</sup> | 501.1      | ND                               |                     |         |
| GS-GPI core + GalNAc + 4th Man                | 1663.5 <sup>+</sup> | 2 <sup>+</sup> | 832.2      | ND                               | 0                   | 0       |
| GS-GPI core + GalNAc + Gal                    |                     | 3 <sup>+</sup> | 555.2      | ND                               |                     |         |
| GS-GPI core + GalNAc + Gal + 4th Man          | 1825.5 <sup>+</sup> | 2 <sup>+</sup> | 913.3      | ND                               | 0                   | 0       |
|                                               |                     | 3 <sup>+</sup> | 609.2      | ND                               |                     |         |
| GS-GPI core + GalNAc + Gal + Neu5Ac           | 1954.6 <sup>+</sup> | 2 <sup>+</sup> | 977.8      | ND                               | 0                   | 0       |
|                                               |                     | 3 <sup>+</sup> | 652.2      | ND                               |                     |         |
| GS-GPI core + GalNAc + Gal + Neu5Ac + 4th Man | 2116.6 <sup>+</sup> | 2 <sup>+</sup> | 1058.8     | ND                               | 0                   | 0       |
|                                               |                     | 3 <sup>+</sup> | 706.2      | ND                               |                     |         |
| Total                                         |                     |                |            |                                  | 7.36 E <sup>3</sup> | 100     |

\* ND: Not detected

Table S4. Identified peptides of human PrP<sup>C</sup> from human brains after HILIC column.

| Fragment                                     | Obsd. m/z | Calcd. m/z | Charge | Score | <i>P</i> |
|----------------------------------------------|-----------|------------|--------|-------|----------|
| <u>Q</u> HTVTTTTK + Gln->pyro-Glu (N-term Q) | 500.2595  | 998.5033   | 2      | 44    | 0.00025  |
| ESQAYYQR                                     | 522.7402  | 1043.4672  | 2      | 39    | 0.00042  |
| YPGQGSPGGR                                   | 545.2570  | 1088.4999  | 2      | 42    | 0.00038  |
| VVEQMCITQYER + Oxidation (M)                 | 786.3609  | 1570.7120  | 2      | 29    | 0.0055   |

Table S5. LC-ESI-MS/MS analysis of GPI-anchor in human PrP<sup>C</sup> from human brains.

| Fragment                                      | Calcd. m/z          | Charge         | Calcd. m/z | Peak intensity                   |                     | % Total |
|-----------------------------------------------|---------------------|----------------|------------|----------------------------------|---------------------|---------|
|                                               |                     |                |            | 2 <sup>+</sup> or 3 <sup>+</sup> | Total               |         |
| G-GPI core                                    | 1211.3 <sup>+</sup> | 2 <sup>+</sup> | 606.2      | ND*                              | 0                   | 0       |
|                                               |                     | 3 <sup>+</sup> | 404.4      | ND                               |                     |         |
| G-GPI core + 4th Man                          | 1373.4 <sup>+</sup> | 2 <sup>+</sup> | 687.2      | ND                               | 0                   | 0       |
|                                               |                     | 3 <sup>+</sup> | 458.5      | ND                               |                     |         |
| G-GPI core + GalNAc                           | 1414.4 <sup>+</sup> | 2 <sup>+</sup> | 707.7      | ND                               | 0                   | 0       |
|                                               |                     | 3 <sup>+</sup> | 472.1      | ND                               |                     |         |
| G-GPI core + GalNAc + 4th Man                 | 1576.4 <sup>+</sup> | 2 <sup>+</sup> | 788.7      | 2.18 E <sup>2</sup>              | 2.18 E <sup>2</sup> | 8.5     |
| G-GPI core + GalNAc + Gal                     |                     | 3 <sup>+</sup> | 526.1      | ND                               |                     |         |
| G-GPI core + GalNAc + Gal + 4th Man           | 1738.5 <sup>+</sup> | 2 <sup>+</sup> | 869.8      | 1.29 E <sup>3</sup>              | 1.29 E <sup>3</sup> | 50.3    |
|                                               |                     | 3 <sup>+</sup> | 580.2      | ND                               |                     |         |
| G-GPI core + GalNAc + Gal + Neu5Ac            | 1867.5 <sup>+</sup> | 2 <sup>+</sup> | 934.3      | 3.58 E <sup>1</sup>              | 3.58 E <sup>1</sup> | 1.4     |
|                                               |                     | 3 <sup>+</sup> | 623.2      | ND                               |                     |         |
| G-GPI core + GalNAc + Gal + Neu5Ac + 4th Man  | 2029.6 <sup>+</sup> | 2 <sup>+</sup> | 1015.3     | 1.02 E <sup>3</sup>              | 1.02 E <sup>3</sup> | 39.8    |
|                                               |                     | 3 <sup>+</sup> | 677.2      | ND                               |                     |         |
| GS-GPI core                                   | 1298.3 <sup>+</sup> | 2 <sup>+</sup> | 649.7      | ND                               | 0                   | 0       |
|                                               |                     | 3 <sup>+</sup> | 433.4      | ND                               |                     |         |
| GS-GPI core + 4th Man                         | 1460.4 <sup>+</sup> | 2 <sup>+</sup> | 730.7      | ND                               | 0                   | 0       |
|                                               |                     | 3 <sup>+</sup> | 487.5      | ND                               |                     |         |
| GS-GPI core + GalNAc                          | 1501.4 <sup>+</sup> | 2 <sup>+</sup> | 751.2      | ND                               | 0                   | 0       |
|                                               |                     | 3 <sup>+</sup> | 501.1      | ND                               |                     |         |
| GS-GPI core + GalNAc + 4th Man                | 1663.5 <sup>+</sup> | 2 <sup>+</sup> | 832.2      | ND                               | 0                   | 0       |
| GS-GPI core + GalNAc + Gal                    |                     | 3 <sup>+</sup> | 555.2      | ND                               |                     |         |
| GS-GPI core + GalNAc + Gal + 4th Man          | 1825.5 <sup>+</sup> | 2 <sup>+</sup> | 913.3      | ND                               | 0                   | 0       |
|                                               |                     | 3 <sup>+</sup> | 609.2      | ND                               |                     |         |
| GS-GPI core + GalNAc + Gal + Neu5Ac           | 1954.6 <sup>+</sup> | 2 <sup>+</sup> | 977.8      | ND                               | 0                   | 0       |
|                                               |                     | 3 <sup>+</sup> | 652.2      | ND                               |                     |         |
| GS-GPI core + GalNAc + Gal + Neu5Ac + 4th Man | 2116.6 <sup>+</sup> | 2 <sup>+</sup> | 1058.8     | ND                               | 0                   | 0       |
|                                               |                     | 3 <sup>+</sup> | 706.2      | ND                               |                     |         |
| Total                                         |                     |                |            |                                  | 2.56 E <sup>3</sup> | 100     |

\* ND: Not detected

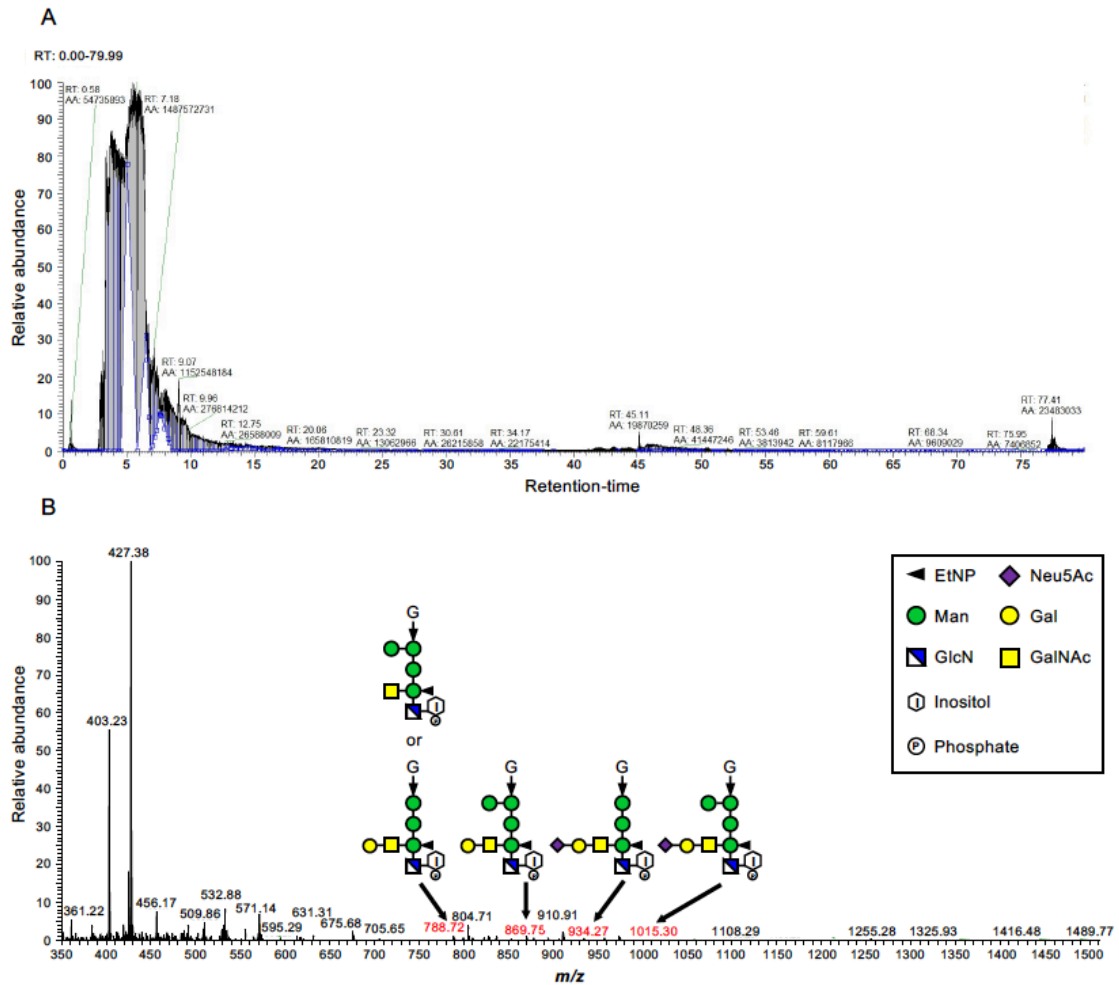

Figure S1: LC-ESI-MS analysis of purified human PrP<sup>C</sup> from KI mouse brains.

A. Total ion chromatogram (TIC) of LC-ESI-MS analysis of purified human PrP<sup>C</sup> from KI mouse brains. B. Total MS spectrum of purified human PrP<sup>C</sup> from KI mouse brains. An average MS spectrum was obtained based on retention-time from 49.75 min to 77.01 min. The  $m/z$  value of the spectrum ranged from 350 to 1500. The peptides containing GPI-glycan were highlighted by red and corresponding structures were shown by schematics. Glycan symbols are according to Symbol Nomenclature for Glycans (42).

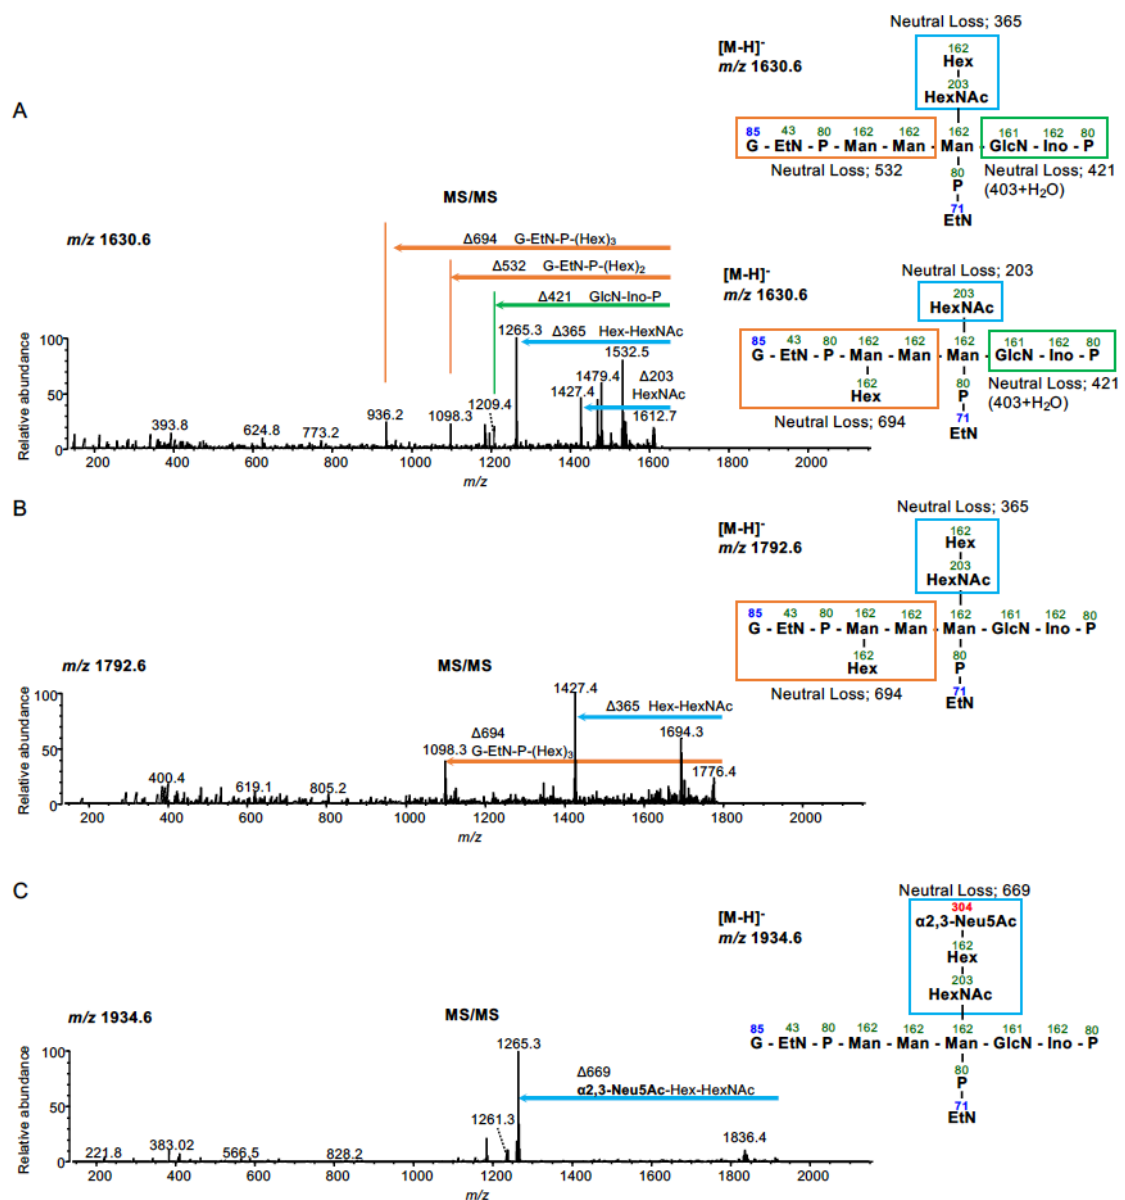

Figure S2: Linkage analysis of sialic acid on GPI-anchor by SALSA method using MALDI-MS. A. The MS/MS spectrum of a C-terminal peptide with GPI containing HexNac and Hex is shown. A 365 Da loss indicates the loss of Hex (Gal) and HexNac (GalNac). A 203 Da loss indicates the loss of HexNac (GalNac). B. The MS/MS spectrum of a C-terminal peptide with GPI containing Hex and HexNac-Hex is shown. 365 Da loss indicates the loss of Hex (Gal) and HexNac (GalNac). C. The MS/MS spectrum of a C-terminal peptide with GPI containing HexNac-Hex-Neu5Ac is shown. 669 Da loss indicates the loss of  $\alpha 2,3$ -linked Sia, Hex (Gal) and HexNac (GalNac).
